# Supplementary material
Source: PubMed Central journal article supplement (PMC5444907)

A

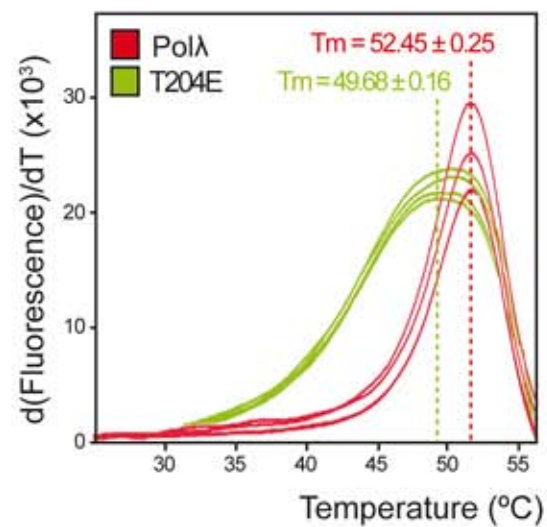

B

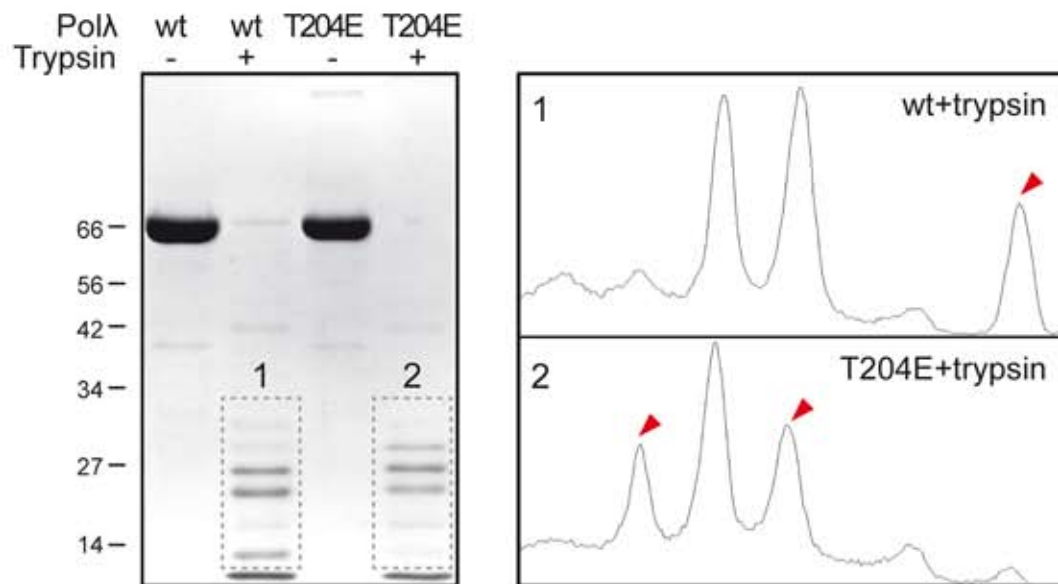

C

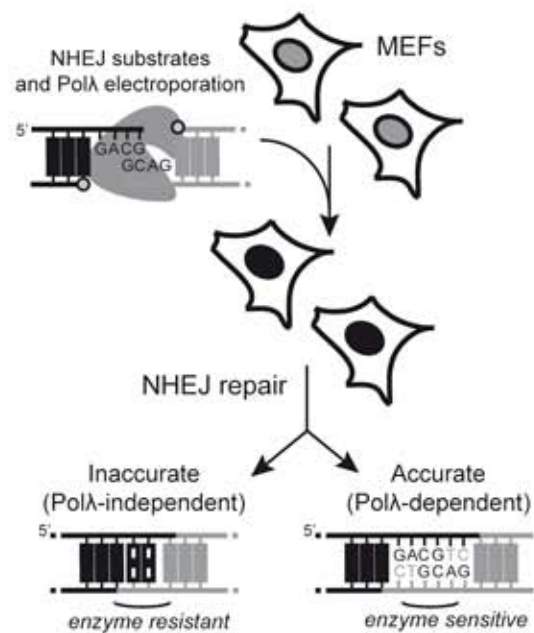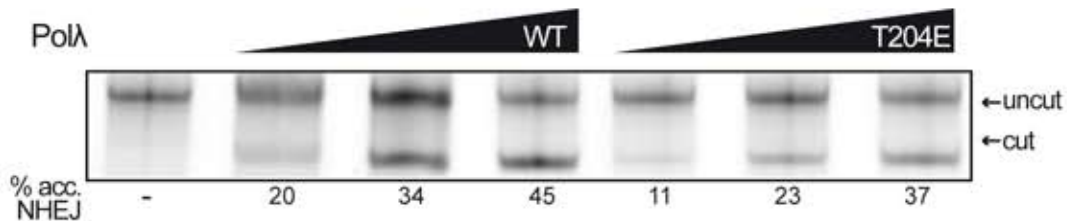

Figure S1

Supplement: NIHMS855181-supplement-Figure_S1.pdf [file NIHMS855181-supplement-Figure_S1.pdf]
